# Supplementary material
Source: PubMed Central journal article supplement (PMC3443947)
Supplement: emmm0004-0528-SD4.pdf [file emmm0004-0528-SD4.pdf]

# *Supporting information*

## **A myelin gene causative of a catatonia-depression syndrome upon aging**

Nora Hagemeyer<sup>1\*</sup>, Sandra Goebbels<sup>2\*</sup>, Sergi Papiol<sup>1,5\*</sup>, Anne Kästner<sup>1</sup>, Sabine Hofer<sup>3,4</sup>, Martin Begemann<sup>1</sup>, Ulrike C. Gerwig<sup>2</sup>, Susann Boretius<sup>3,5</sup>, Georg L. Wieser<sup>2</sup>, Anja Ronnenberg<sup>1</sup>, Artem Gurvich<sup>1</sup>, Stephan H. Heckers<sup>6</sup>, Jens Frahm<sup>3,5</sup>, Klaus-Armin Nave<sup>2,5§</sup> and Hannelore Ehrenreich<sup>1,5§</sup>

*\*These authors contributed equally to this work.*

<sup>1</sup>Division of Clinical Neuroscience, Max Planck Institute of Experimental Medicine, <sup>2</sup>Department of Neurogenetics, Max Planck Institute of Experimental Medicine,

<sup>3</sup>Biomedizinische NMR Forschungs GmbH, Max Planck Institute for Biophysical Chemistry,

<sup>4</sup>Bernstein Center for Computational Neuroscience (BCCN),

<sup>5</sup>DFG Research Center for Molecular Physiology of the Brain (CMPB),

Göttingen, Germany

<sup>6</sup>Vanderbilt Department of Psychiatry, Nashville, TN, USA

### **Contents:**

**(1) Supporting Table I**

**(2) Supporting Table II**

**(3) Supporting Figure 1**

**(4) Supporting Videos:**

**1 - Catalepsy Test Cnp+/-**

**2 - Catalepsy Test Wt**

## Supporting Table I

**Case-control analysis for SNP rs2070106 in exon 4 of 2',3'-cyclic nucleotide 3'-phosphodiesterase (CNP) human gene.** No statistically significant differences were observed between schizophrenic /schizoaffective cases and controls with respect to genotypic and allelic frequencies.

| <i>Case-control</i> |                  |                 |             |                  |
|---------------------|------------------|-----------------|-------------|------------------|
|                     | <b>Genotypes</b> |                 |             | <b>P-value</b>   |
|                     | <b>GG</b>        | <b>GA</b>       | <b>AA</b>   | <b>Genotypic</b> |
| Controls (n=1045)   | 459 (43.9%)      | 476 (45.6%)     | 110 (10.5%) | 0.716            |
| Cases (n=1048)      | 477 (45.5%)      | 459 (43.8%)     | 112 (10.7%) |                  |
|                     | <b>Alleles</b>   |                 |             | <b>P-value</b>   |
|                     | <b>G allele</b>  | <b>A allele</b> |             | <b>Allelic</b>   |
| Controls (2n=2090)  | 1394 (66.7%)     | 696 (33.3%)     |             | 0.622            |
| Cases (2n=2096)     | 1413 (67.4%)     | 683 (32.6%)     |             |                  |

*Both cases and controls fulfilled Hardy-Weinberg equilibrium criteria (Chi-square test P=0.99 and P=0.71, respectively)*

## Supporting Table II

**Catonia-depression composite score: Descriptives and ANOVA results upon inclusion of all 3 genotypes.** The data show that heterozygous (GA) subjects have very similar composite score to GG carriers; they do not reveal an intermediate phenotype or A allele dosage-dependent effect.

### Descriptives

Composite score

|       | N   | Mean  | Std. Deviation | Std. Error | 95% Confidence Interval for Mean |             | Minimum | Maximum |
|-------|-----|-------|----------------|------------|----------------------------------|-------------|---------|---------|
|       |     |       |                |            | Lower Bound                      | Upper Bound |         |         |
| AA    | 40  | .3794 | .86258         | .13639     | .1036                            | .6553       | -1.13   | 1.91    |
| GA    | 188 | .0497 | .76584         | .05585     | -.0605                           | .1599       | -1.20   | 2.72    |
| GG    | 202 | .0308 | .74461         | .05239     | -.0725                           | .1341       | -1.20   | 2.44    |
| Total | 430 | .0715 | .77000         | .03713     | -.0015                           | .1445       | -1.20   | 2.72    |

### ANOVA

Composite score

|                | Sum of Squares | df  | Mean Square | F     | Sig. |
|----------------|----------------|-----|-------------|-------|------|
| Between Groups | 4.217          | 2   | 2.108       | 3.599 | .028 |
| Within Groups  | 250.138        | 427 | .586        |       |      |
| Total          | 254.355        | 429 |             |       |      |

## Supporting Figure 1

### Correlation of genotypes with the catatonia-depression composite score sub-items across age groups

(A) Composite score presented for overview; (B)-(F) Grey bars in the background display the age distribution of the total GRAS sample of schizophrenic patients (n=1048). Red or white circles denote the mean values of the individual sub-item according to the respective age group and genotype (red=AA; black=GG). In most panels, the linear regression lines of the genotypes dissociate clearly after the age of 40 years. (B) Catatonia; (C) Depression; (D) Loss of interest; (E) Social interaction; (F) Social withdrawal/anxiety. Compare Figure 3C, main text.

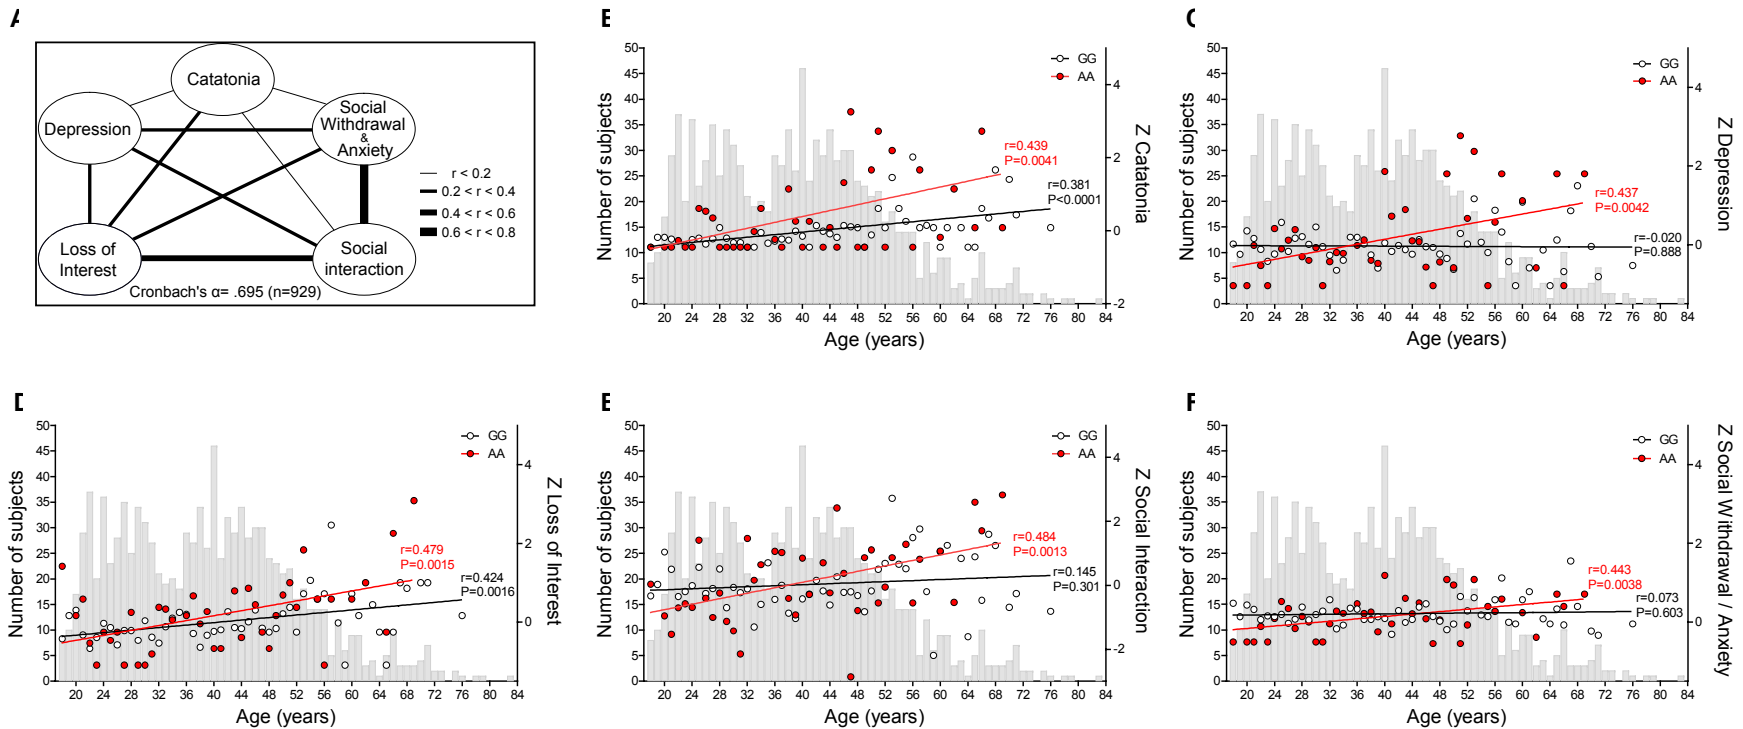

## Supporting Videos:

1 - Catalepsy Test *Cnp*<sup>+/-</sup>

2 - Catalepsy Test Wt

A phenotype, thus far observed in mice only upon pinching or drug exposure (cannabinoids) is catatonia/catalepsy, a state of immobility where mice persist in an externally imposed abnormal posture for a prolonged time period. In the bar test, 24 months old male mice are put into a position where they have to grab a bar while standing with their hind paws on the floor. *Cnp*<sup>+/-</sup> mice persisted in this posture (Video 1), whereas Wt mice swiftly left this position (Video 2).
